# Supplementary material for: SCN8A mutations in Chinese patients with early onset epileptic encephalopathy and benign infantile seizures
Source: PubMed Central journal article supplement (PMC5604297; doi:10.1186/s12881-017-0460-1), 2017-09-18
Supplement: 12881_2017_460_MOESM2_ESM.pdf [file 12881_2017_460_MOESM2_ESM.pdf]

**Additional file 2. 485 genes in the targeted-next generation sequencing panel**

|                 |                 |                 |                |                 |                 |                 |                 |                |
|-----------------|-----------------|-----------------|----------------|-----------------|-----------------|-----------------|-----------------|----------------|
| <i>ABAT</i>     | <i>BDNF</i>     | <i>CPA6</i>     | <i>GABRA4</i>  | <i>HSD17B10</i> | <i>MIB1</i>     | <i>PEX5</i>     | <i>SCN1B</i>    | <i>ST3GAL3</i> |
| <i>ABCB1</i>    | <i>BLVRB</i>    | <i>CPS1</i>     | <i>GABRA5</i>  | <i>HTR1A</i>    | <i>MMADHC</i>   | <i>PEX6</i>     | <i>SCN2A</i>    | <i>ST3GAL5</i> |
| <i>ABCC2</i>    | <i>BRAT1</i>    | <i>CPT2</i>     | <i>GABRA6</i>  | <i>IDH2</i>     | <i>MOCS1</i>    | <i>PFKL</i>     | <i>SCN2B</i>    | <i>STK11</i>   |
| <i>ABCC8</i>    | <i>BRD2</i>     | <i>CRH</i>      | <i>GABRB2</i>  | <i>IDS</i>      | <i>MOCS2</i>    | <i>PFKM</i>     | <i>SCN3A</i>    | <i>STRADA</i>  |
| <i>ABCG2</i>    | <i>BTD</i>      | <i>CS</i>       | <i>GABRB3</i>  | <i>IER3IP1</i>  | <i>MOG</i>      | <i>PHF6</i>     | <i>SCN3B</i>    | <i>STXBP1</i>  |
| <i>ACADM</i>    | <i>C10ORF2</i>  | <i>CSTB</i>     | <i>GABRD</i>   | <i>IL6ST</i>    | <i>MR1</i>      | <i>PHGDH</i>    | <i>SCN4A</i>    | <i>SUOX</i>    |
| <i>ACMSD</i>    | <i>C3</i>       | <i>CTDP1</i>    | <i>GABRG2</i>  | <i>IMPA2</i>    | <i>MSN</i>      | <i>PHOX2A</i>   | <i>SCN5A</i>    | <i>SV2A</i>    |
| <i>ACO2</i>     | <i>CA1</i>      | <i>CTSD</i>     | <i>GABRR2</i>  | <i>INA</i>      | <i>MTHFR</i>    | <i>PIGA</i>     | <i>SCN7A</i>    | <i>SYN1</i>    |
| <i>ACOX1</i>    | <i>CACNA1A</i>  | <i>CUL4B</i>    | <i>GAD1</i>    | <i>IQSEC2</i>   | <i>MTMR9</i>    | <i>PIGL</i>     | <i>SCN8A</i>    | <i>SYNGAP1</i> |
| <i>ACP1</i>     | <i>CACNA1E</i>  | <i>CXCR1</i>    | <i>GAMT</i>    | <i>JRK</i>      | <i>MTOR</i>     | <i>PIGN</i>     | <i>SCN9A</i>    | <i>SYP</i>     |
| <i>ACSF3</i>    | <i>CACNA1G</i>  | <i>CYP11A1</i>  | <i>GATM</i>    | <i>JUN</i>      | <i>MTR</i>      | <i>PIGO</i>     | <i>SDHA</i>     | <i>SYT11</i>   |
| <i>ACTA2</i>    | <i>CACNA1H</i>  | <i>CYP3A4</i>   | <i>GBA</i>     | <i>KARS</i>     | <i>MYO5C</i>    | <i>PIGV</i>     | <i>SEMA3A</i>   | <i>SZT2</i>    |
| <i>ACTB</i>     | <i>CACNA2D2</i> | <i>CYP4F11</i>  | <i>GC</i>      | <i>KCNA1</i>    | <i>NAGA</i>     | <i>PIR</i>      | <i>SEPSECS</i>  | <i>TAP1</i>    |
| <i>ACY1</i>     | <i>CACNB4</i>   | <i>D2HGDH</i>   | <i>GCDH</i>    | <i>KCND2</i>    | <i>NDE1</i>     | <i>PKHD1</i>    | <i>SERPINI1</i> | <i>TBC1D24</i> |
| <i>ADAR</i>     | <i>CACNG2</i>   | <i>DBP</i>      | <i>GCH1</i>    | <i>KCNE2</i>    | <i>NDP</i>      | <i>PLCB1</i>    | <i>SEZ6</i>     | <i>TBCE</i>    |
| <i>ADCK3</i>    | <i>CALHM1</i>   | <i>DCX</i>      | <i>GCM2</i>    | <i>KCNH5</i>    | <i>NDUFV1</i>   | <i>PLEC</i>     | <i>SGCE</i>     | <i>TBX1</i>    |
| <i>ADK</i>      | <i>CASK</i>     | <i>DDC</i>      | <i>GCSH</i>    | <i>KCNH6</i>    | <i>NEDD4L</i>   | <i>PNKD</i>     | <i>SHANK3</i>   | <i>TCF4</i>    |
| <i>ADORA1</i>   | <i>CASP9</i>    | <i>DEPDC5</i>   | <i>GIPC3</i>   | <i>KCNJ1</i>    | <i>NGLY1</i>    | <i>PNKP</i>     | <i>SHBG</i>     | <i>THUMPDI</i> |
| <i>ADRA1B</i>   | <i>CASR</i>     | <i>DGCR2</i>    | <i>GJA1</i>    | <i>KCNJ10</i>   | <i>NHLRC1</i>   | <i>PNPO</i>     | <i>SLC12A1</i>  | <i>TICAM1</i>  |
| <i>ADSL</i>     | <i>CBS</i>      | <i>DGKD</i>     | <i>GJD2</i>    | <i>KCNJ11</i>   | <i>NIPA2</i>    | <i>POLG</i>     | <i>SLC12A6</i>  | <i>TK2</i>     |
| <i>AFG3L2</i>   | <i>CCDC88C</i>  | <i>DHFR</i>     | <i>GLB1</i>    | <i>KCNJ6</i>    | <i>NOS1</i>     | <i>POLG2</i>    | <i>SLC16A1</i>  | <i>TLR3</i>    |
| <i>AGTR2</i>    | <i>CCL3</i>     | <i>DIAPH3</i>   | <i>GLDC</i>    | <i>KCNK3</i>    | <i>NPTX2</i>    | <i>PPP1R3C</i>  | <i>SLC17A5</i>  | <i>TMEM67</i>  |
| <i>ALDH4A1</i>  | <i>CCL4</i>     | <i>DLX2</i>     | <i>GLRA1</i>   | <i>KCNK9</i>    | <i>NPY</i>      | <i>PPT1</i>     | <i>SLC17A7</i>  | <i>TNF</i>     |
| <i>ALDH5A1</i>  | <i>CCM2</i>     | <i>DLX5</i>     | <i>GLRB</i>    | <i>KCNMA1</i>   | <i>NRXN1</i>    | <i>PRF1</i>     | <i>SLC19A3</i>  | <i>TNS1</i>    |
| <i>ALDH7A1</i>  | <i>CDK5</i>     | <i>DNM1</i>     | <i>GLUD1</i>   | <i>KCNQ2</i>    | <i>NSDHL</i>    | <i>PRICKLE1</i> | <i>SLC1A1</i>   | <i>TPP1</i>    |
| <i>ALG13</i>    | <i>CDKL5</i>    | <i>DPM1</i>     | <i>GM2A</i>    | <i>KCNQ3</i>    | <i>NSF</i>      | <i>PRICKLE2</i> | <i>SLC1A2</i>   | <i>TPRXL</i>   |
| <i>AMACR</i>    | <i>CHD2</i>     | <i>DPYS</i>     | <i>GOSR2</i>   | <i>KCNQ4</i>    | <i>NTRK1</i>    | <i>PRNP</i>     | <i>SLC1A3</i>   | <i>TREX1</i>   |
| <i>AMT</i>      | <i>CHGA</i>     | <i>DYRK1A</i>   | <i>GPHN</i>    | <i>KCNT1</i>    | <i>NTRK2</i>    | <i>PRODH</i>    | <i>SLC20A2</i>  | <i>TRMT44</i>  |
| <i>ANK3</i>     | <i>CHRFAM7A</i> | <i>EEF1A2</i>   | <i>GPR56</i>   | <i>KCNV2</i>    | <i>OPA1</i>     | <i>PRRT2</i>    | <i>SLC25A12</i> | <i>TRMU</i>    |
| <i>ANKRD11</i>  | <i>CHRNA2</i>   | <i>EFHC1</i>    | <i>GPR98</i>   | <i>KCTD7</i>    | <i>OPHN1</i>    | <i>PSAP</i>     | <i>SLC25A13</i> | <i>TRPM6</i>   |
| <i>AP4E1</i>    | <i>CHRNA4</i>   | <i>EFHC2</i>    | <i>GPX1</i>    | <i>KDM5C</i>    | <i>OPRM1</i>    | <i>PSAT1</i>    | <i>SLC25A22</i> | <i>TSC1</i>    |
| <i>AQP4</i>     | <i>CHRNA5</i>   | <i>EGF</i>      | <i>GRIA3</i>   | <i>KLK1</i>     | <i>OTX2</i>     | <i>PSEN1</i>    | <i>SLC2A1</i>   | <i>TSC2</i>    |
| <i>ARC</i>      | <i>CHRNA7</i>   | <i>EGR1</i>     | <i>GRIK1</i>   | <i>KRIT1</i>    | <i>PAFAH1B1</i> | <i>PSEN2</i>    | <i>SLC35A3</i>  | <i>TSEN2</i>   |
| <i>ARG1</i>     | <i>CHRN2</i>    | <i>EGR3</i>     | <i>GRIK2</i>   | <i>LICAM</i>    | <i>PAH</i>      | <i>PTEN</i>     | <i>SLC35C1</i>  | <i>TSEN34</i>  |
| <i>ARHGEF15</i> | <i>CLCN2</i>    | <i>EHMT1</i>    | <i>GRIN1</i>   | <i>LAMA2</i>    | <i>PALLD</i>    | <i>PTH</i>      | <i>SLC46A1</i>  | <i>TSEN54</i>  |
| <i>ARHGEF9</i>  | <i>CLCN4</i>    | <i>EIF2AK3</i>  | <i>GRIN2A</i>  | <i>LAMB1</i>    | <i>PANX1</i>    | <i>PTS</i>      | <i>SLC4A3</i>   | <i>TSPO</i>    |
| <i>ARSA</i>     | <i>CLCNKB</i>   | <i>ELOVL4</i>   | <i>GRIN2B</i>  | <i>LBR</i>      | <i>PARK2</i>    | <i>QDPR</i>     | <i>SLC6A1</i>   | <i>TUBA1A</i>  |
| <i>ARX</i>      | <i>CLEC18A</i>  | <i>ELP4</i>     | <i>GRM1</i>    | <i>LGII</i>     | <i>PC</i>       | <i>RAB39B</i>   | <i>SLC6A11</i>  | <i>TUBA8</i>   |
| <i>ASAH1</i>    | <i>CLIC2</i>    | <i>EMX2</i>     | <i>GRN</i>     | <i>LGI2</i>     | <i>PCDH19</i>   | <i>RANBP2</i>   | <i>SLC6A13</i>  | <i>TUBB2B</i>  |
| <i>ASCL1</i>    | <i>CLN3</i>     | <i>EN2</i>      | <i>HAX1</i>    | <i>LGI4</i>     | <i>PDCD10</i>   | <i>RBFOX1</i>   | <i>SLC6A19</i>  | <i>TUBGCP6</i> |
| <i>ASIC1</i>    | <i>CLN5</i>     | <i>EPM2A</i>    | <i>HCCS</i>    | <i>LIAS</i>     | <i>PDHA1</i>    | <i>RBFOX3</i>   | <i>SLC6A8</i>   | <i>U2AF1</i>   |
| <i>ASPA</i>     | <i>CLN6</i>     | <i>EPM2AIP1</i> | <i>HCFC1</i>   | <i>LIFR</i>     | <i>PDHX</i>     | <i>RBPJ</i>     | <i>SLC9A2</i>   | <i>UBC</i>     |
| <i>ASPM</i>     | <i>CLN8</i>     | <i>EXT1</i>     | <i>HCN1</i>    | <i>LMBRD1</i>   | <i>PDXK</i>     | <i>RCN2</i>     | <i>SLC9A3</i>   | <i>UBE2A</i>   |
| <i>ASS1</i>     | <i>CNP</i>      | <i>FADD</i>     | <i>HCN2</i>    | <i>MANBA</i>    | <i>PDYN</i>     | <i>RDX</i>      | <i>SLC9A6</i>   | <i>UBE3A</i>   |
| <i>ATIC</i>     | <i>CNR1</i>     | <i>FARS2</i>    | <i>HCN4</i>    | <i>MAOB</i>     | <i>PEX1</i>     | <i>RELN</i>     | <i>SLC9A9</i>   | <i>UBR5</i>    |
| <i>ATN1</i>     | <i>CNTF</i>     | <i>FKTN</i>     | <i>HDAC4</i>   | <i>MAP2</i>     | <i>PEX10</i>    | <i>RHAG</i>     | <i>SMARCA2</i>  | <i>VAMP2</i>   |
| <i>ATP1A2</i>   | <i>CNTN2</i>    | <i>FLNA</i>     | <i>HEPACAM</i> | <i>MAPK3</i>    | <i>PEX12</i>    | <i>RHOA</i>     | <i>SMARCA4</i>  | <i>VLDLR</i>   |
| <i>ATP1A3</i>   | <i>CNTNAP2</i>  | <i>FOLR1</i>    | <i>HEXA</i>    | <i>MBD5</i>     | <i>PEX13</i>    | <i>RMND1</i>    | <i>SNIP1</i>    | <i>VPS13A</i>  |
| <i>ATP2A2</i>   | <i>COG6</i>     | <i>FOS</i>      | <i>HEXB</i>    | <i>MBTPS2</i>   | <i>PEX14</i>    | <i>RNASEH2A</i> | <i>SOBP</i>     | <i>WARS</i>    |
| <i>ATP6AP2</i>  | <i>COG8</i>     | <i>FOXG1</i>    | <i>HLCS</i>    | <i>ME2</i>      | <i>PEX16</i>    | <i>RNF213</i>   | <i>SPAST</i>    | <i>WDR45</i>   |
| <i>ATP6V0A2</i> | <i>COL4A1</i>   | <i>FUCA1</i>    | <i>HMGCL</i>   | <i>MECP2</i>    | <i>PEX19</i>    | <i>ROGDI</i>    | <i>SPR</i>      | <i>ZEB2</i>    |
| <i>ATP7A</i>    | <i>COL6A2</i>   | <i>GABBR1</i>   | <i>HNRNPU</i>  | <i>MED17</i>    | <i>PEX2</i>     | <i>RPS6KA3</i>  | <i>SPTAN1</i>   | <i>GABRB1</i>  |
| <i>AUH</i>      | <i>COQ2</i>     | <i>GABBR2</i>   | <i>HOXA1</i>   | <i>MEF2C</i>    | <i>PEX26</i>    | <i>SCARB2</i>   | <i>SRGAP2</i>   | <i>SLC12A5</i> |

*BCKDK*   *COQ9*   *GABRA1*   *HPD*   *MFSD8*   *PEX3*   *SCN1A*   *SRPX2*

---
